# Supplementary material for: Fostering bioinformatics education through skill development of professors: Big Genomic Data Skills Training for Professors
Source: PubMed Central journal article supplement (PMC6563947; doi:10.1371/journal.pcbi.1007026), 2019-06-13
Supplement: pcbi.1007026.s001.pdf [file pcbi.1007026.s001.pdf]

# Big Genomic Data Skills Training for Professors

*The Jackson Laboratory for Genomic Medicine (JAX-GM)  
Farmington, Connecticut*

**May 21-25, 2018**

## **SAMPLE SCHEDULE**

### **Monday, May 21**

|                |                                                                                                                                                                  |
|----------------|------------------------------------------------------------------------------------------------------------------------------------------------------------------|
| <b>8:00am</b>  | <b>Registration</b>                                                                                                                                              |
| <b>8:30am</b>  | <b>Welcome and Introduction</b>                                                                                                                                  |
| <b>9:00am</b>  | <b>Introduction to Data Science with Biological Emphasis</b>                                                                                                     |
| <b>10:00am</b> | <b>Introduction to High Throughput Sequencing Technologies</b>                                                                                                   |
| <b>11:00am</b> | <b>Hands on Work: Setting up Computing Infrastructure and Introductions to Galaxy, Genome Space, IGV, Gene Pattern, R, and Slack. Setting up of basic tools.</b> |
| <b>12:00pm</b> | <b>Lunch</b>                                                                                                                                                     |
| <b>1:00pm</b>  | <b>Introduction to Linux</b>                                                                                                                                     |
| <b>2:30pm</b>  | <b>Essential Statistical Analysis</b>                                                                                                                            |
| <b>3:30pm</b>  | <b>Break</b>                                                                                                                                                     |
| <b>4:00pm</b>  | <b>Curricular Discussion – Presentation and Discussion of UG courses in Genomics, presentation of previous and existing syllabi</b>                              |
| <b>5:00pm</b>  | <b>RNA-sequencing Seminar</b>                                                                                                                                    |
| <b>6:00pm</b>  | <b>Light Dinner</b>                                                                                                                                              |
| <b>7:00pm</b>  | <b>Evening Lecture</b>                                                                                                                                           |

### **Tuesday, May 22**

|                |                                                                                                               |
|----------------|---------------------------------------------------------------------------------------------------------------|
| <b>8:30am</b>  | <b>RNA-sequencing Introduction</b>                                                                            |
| <b>9:00am</b>  | <b>Module #1: RNA-sequencing as Measurement Tool; Hands-on Work</b>                                           |
| <b>10:00am</b> | <b>Break</b>                                                                                                  |
| <b>10:30am</b> | <b>Module #1: Hands-on Work continued</b>                                                                     |
| <b>12:00pm</b> | <b>Lunch</b>                                                                                                  |
| <b>1:00pm</b>  | <b>Module Debrief: Lessons learned, Q &amp; A.</b>                                                            |
| <b>1:30pm</b>  | <b>Gene Set Enrichment and Pathway Analysis</b>                                                               |
| <b>2:30pm</b>  | <b>Hands-on Work; Advanced and Derived RNAseq Analysis</b>                                                    |
| <b>4:00pm</b>  | <b>Break</b>                                                                                                  |
| <b>4:30pm</b>  | <b>Module #2: Variant Discovery in Genomic Sequence; Hands-on Work; Mutation and Functional Analysis in R</b> |

### Wednesday, May 23

- 8:30am Debrief on Module #2 Variant Calling: Lessons learned, Q & A.
- 9:00am Exome Sequencing for Variant Discovery
- 10:00am Module #3: Exome Sequencing Variant Discovery in Galaxy
- 12:00am Lunch
- 1:00pm Introduction to Microbiome
- 2:00pm Hands-on Work: Microbiome
- 3:30pm Break
- 4:00pm Curricular Discussion #2
- 4:30pm Cloud Resources and Galaxy

### Thursday, May 24

- 8:30am Data in Context
- 9:30am Network Modeling
- 10:30am Network Modeling short exercises
- 12:00am Lunch
- 1:00pm Data Standards and Best Practices Data Problems: When bad things happen in genomic analysis
- 2:00pm Introduction to CHIP-seq
- 4:00pm Break
- 4:30pm Module Debriefing on Exome, Microbiome, Network, and CHIP-seq; Open Discussion on Participant Needs and Data
- 5:30pm Reception Dinner

### Friday, May 25

- 8:30am Integrated Modeling of Genetic and Genomic Data
- 9:30am Running UG Courses in Genomics
- 11:00am Cloud Environments and Web Service Grants
- 12:00pm Lunch
- 1:00pm Collaborative Discussion, Next Steps, and How to Support UG Implementations
