# Supplementary material for: Fostering bioinformatics education through skill development of professors: Big Genomic Data Skills Training for Professors
Source: PubMed Central journal article supplement (PMC6563947; doi:10.1371/journal.pcbi.1007026), 2019-06-13
Supplement: pcbi.1007026.s004.pdf [file pcbi.1007026.s004.pdf]

## JAX BD2K Participating Institutions\*

Adams State University, CO  
Agnes Scott College, GA  
Albion College, MI  
Baruch College, CUNY, NY  
Bates College, ME  
Bemidji State University, MN  
Bethune-Cookman University, FL  
Bucknell University, PA  
Clark Atlanta University, GA  
Colby College, ME  
*Dalhousie University, NS*  
DeSales University, PA  
Eastern Kentucky University, KY  
*Eastern Virginia Medical School, VA*  
Franklin Pierce University, NH  
Inter American University, PR  
Jackson State University, MS  
King University, TN  
Lock Haven University, PA  
Luther College, IA  
Maine Medical Partners, ME  
Meharry Medical College, TN  
Metropolitan State University of Denver, CO  
Middlebury College, VT  
Minnesota State University Moorhead, MN  
Moravian College, PA  
Morehead State University, KY  
Morgan State University, MD  
New Mexico Highlands University, NM  
New Mexico State University, NM  
North Carolina Central University, NC  
Northeastern State University, OK  
Northern Kentucky University, KY  
Northern Michigan University, MI  
Northern New Mexico College, NM  
Oakland University School of Medicine, MI  
*Oklahoma State University, OK*  
Prairie View A & M, TX  
Salisbury University, MD  
Salve Regina University, RI  
Southern Arkansas University, AR  
Southern Connecticut State University, CT  
Southern Illinois Univ School of Medicine, IL

St. Edward's University, TX  
*SUNY Oswego, NY*  
Tennessee State University, TN  
Trinity College, CT  
Trinity Washington University, DC  
U Maine Machias, ME  
UConn Health, CT  
United States Air Force Academy, CO  
University of Alaska Fairbanks  
*University of Arkansas for Medical Sciences*  
*University of California, Irvine*  
University of Central Arkansas  
University of Detroit Mercy, MI  
University of Nevada, Reno  
University of New England, ME  
University of New Haven, CT  
University of North Carolina at Pembroke  
University of North Dakota  
University of Puerto Rico  
University of Puerto Rico at Cayey  
*University of Rhode Island*  
University of Saint Joseph, CT  
*University of South Florida*  
*University of Tennessee at Chattanooga*  
University of Texas at Dallas  
University of Texas-Rio Grande Valley  
*University of Wyoming*  
University of Vermont  
*Virginia Commonwealth University*  
Voorhees College, SC  
*Washington University, MO*  
*Wayne State University School of Medicine, MI*  
Western Kentucky University, KY  
Wheaton College, MA  
Xavier University of Louisiana

Institutions in *italics* participating in a graduate level JAX BD2K workshop offering
